# Supplementary material
Source: MDPI journal article supplement (https://www.mdpi.com/1996-1073/16/9/3804)
Supplement: s1 [file s1]

# Supporting information for

## Geochemical and Microstructural Characteristics of

### Clay Minerals and Their Effects on the Pore Structure of

### Coal-Measure Shale: A Case Study in Qinshui Basin, China

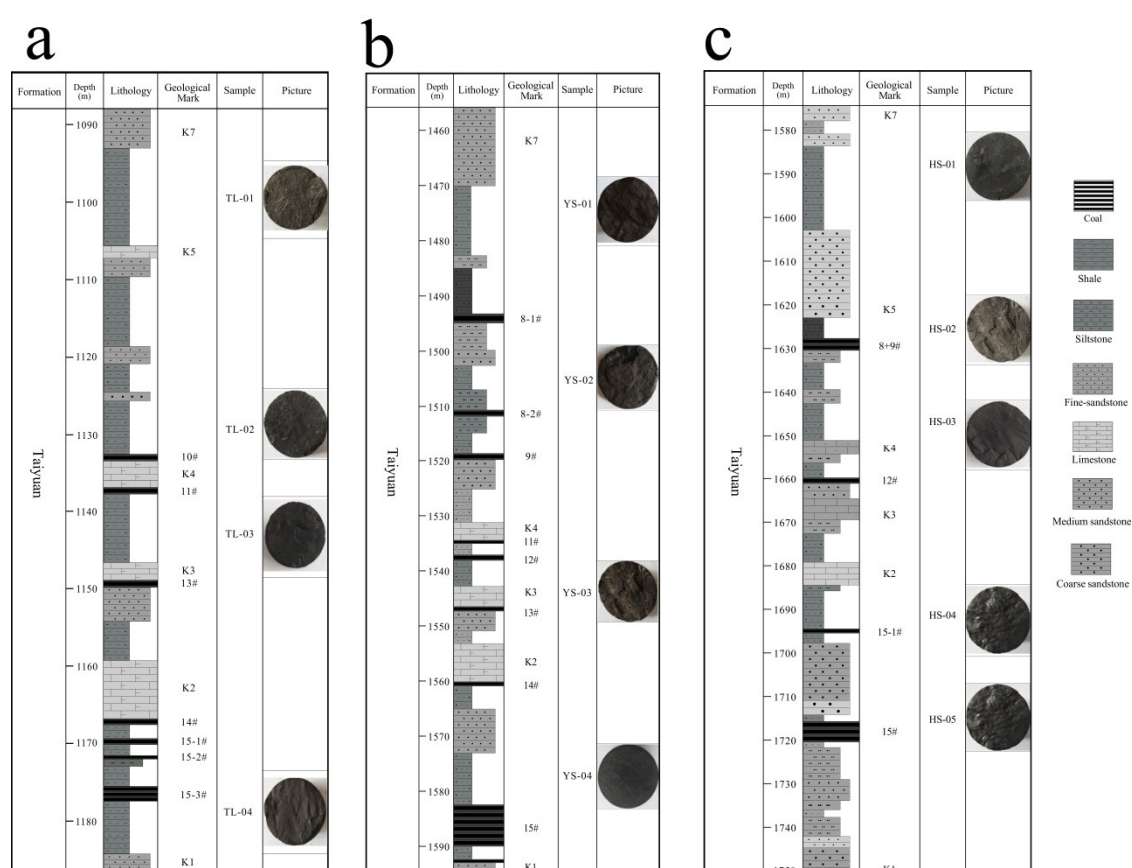

**Figure S1.** Stratigraphic column of Taiyuan formation in study area and position of samples, (a) Well TL-01; (b) YS-01; (c) Well HS-01.

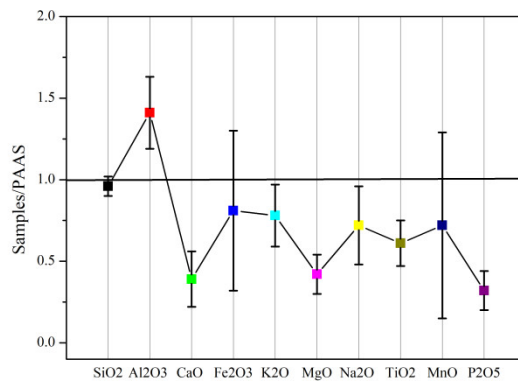

**Figure S2.** Elemental concentrations of the average of samples  
VS. those of the PAAS (Taylor and McLennan 1985).

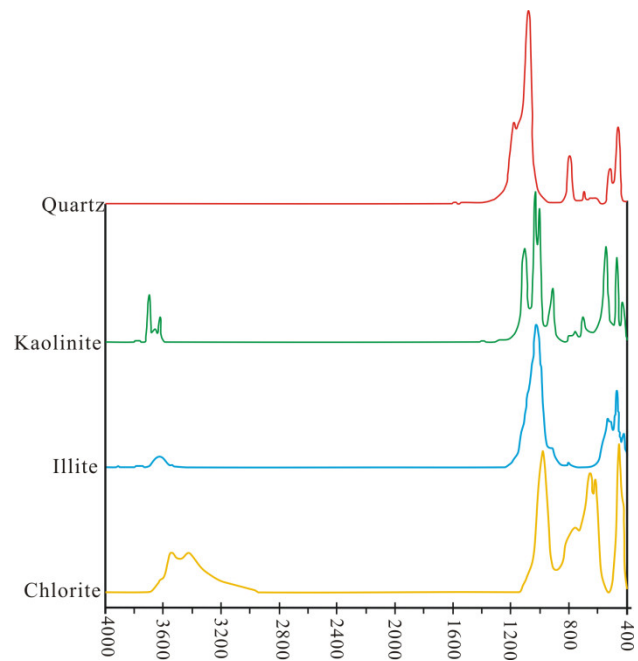

**Figure S3.** FTIR standard spectra of main minerals in the TYS.

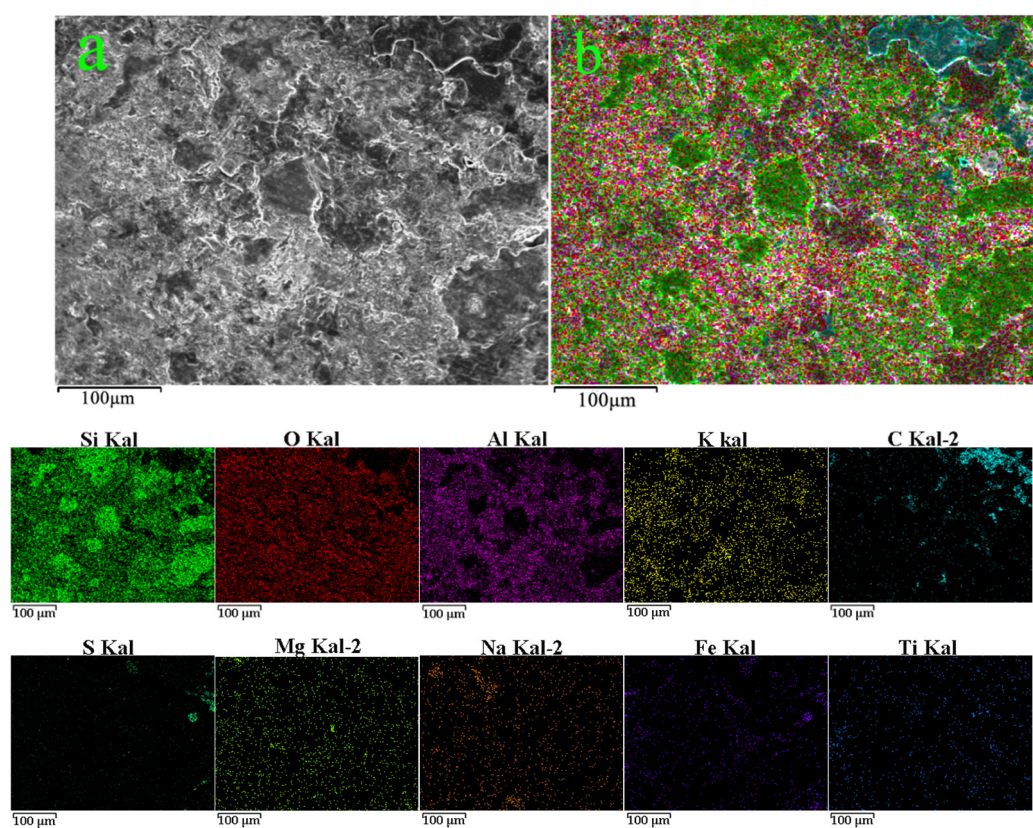

**Figure S4.** EDS surface scanning images of TYS samples.

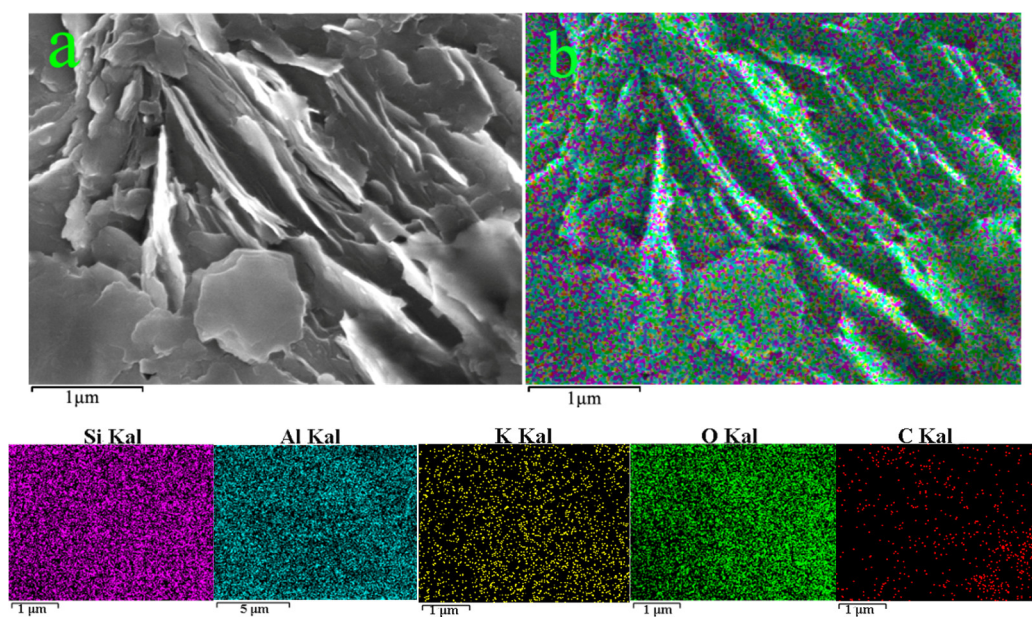

**Figure S5.** Kaolinite coexist with organic matters and contains K element.

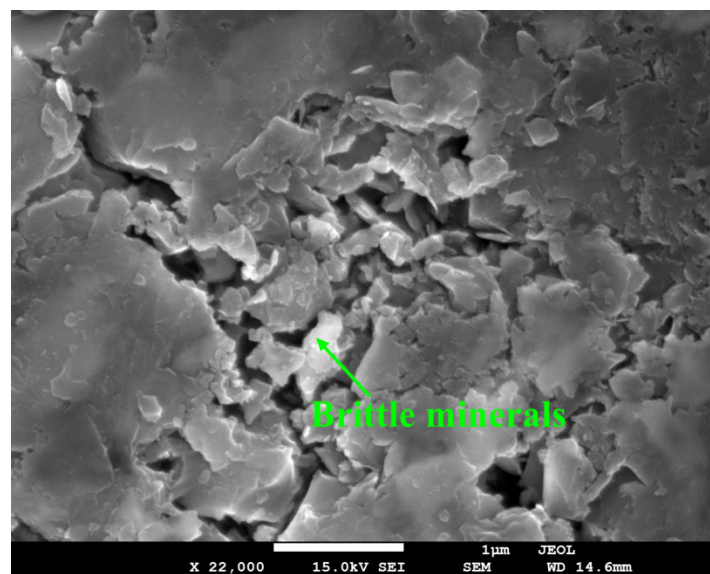

**Figure S6.** Brittle minerals as rigid particles in the pores.
